# Supplementary material for: Clinical Feasibility and Early Outcomes of Preoperative Three-Dimensional Modeling Techniques in Complex Maxillofacial Surgery: A Prospective Clinical Study
Source: Research Square preprint supplement (doi:10.21203/rs.3.rs-8242530/v1), 2025-12-22
Supplement: Supplementary file 1 [file 5aa6ef616aece5d780f0f4bb.docx]

STROBE Checklist — Observational Studies (Cohort)

Manuscript title: Clinical Feasibility and Early Outcomes of Preoperative Three‑Dimensional Modeling Techniques in Complex Maxillofacial Surgery

Journal: BMC Oral Health

| Item | Recommendation | Location in manuscript |
| --- | --- | --- |
| Title/Abstract | Indicate study design; informative abstract | Title & Abstract |
| Background/Rationale | Scientific background and rationale | Introduction |
| Objectives | Specific objectives/hypotheses | Introduction |
| Study design | Key elements of design | Materials and Methods |
| Setting | Locations and dates | Materials and Methods |
| Participants | Eligibility criteria and selection methods | Materials and Methods |
| Variables | Clearly define outcomes, exposures | Materials and Methods |
| Data sources/measurement | Methods of assessment | Materials and Methods |
| Bias | Address sources of bias | Discussion—Limitations |
| Study size | Explain how size was arrived at | Materials and Methods |
| Quantitative variables | Explain handling of quantitative variables | Materials and Methods |
| Statistical methods | Methods and confounding | Materials and Methods |
| Participants (Results) | Numbers at each stage | Results |
| Descriptive data | Characteristics of participants | Results & Table 1 |
| Outcome data | Numbers of outcome events | Results & Table 2 |
| Main results | Unadjusted estimates and precision | Results |
| Other analyses | Subgroup/sensitivity analyses | Not applicable (small cohort) |
| Key results | Summarize key results with objectives | Discussion—Principal findings |
| Limitations | Discuss limitations and bias | Discussion—Limitations |
| Interpretation | Cautious overall interpretation | Discussion |
| Generalisability | External validity | Discussion |
| Funding | Sources of funding/role of funders | Declarations—Funding |
